# Supplementary material for: Converting 2D inorganic–organic ZnSe–DETA hybrid nanosheets into 3D hierarchical nanosheet-based ZnSe microspheres with enhanced visible-light-driven photocatalytic performances
Source: Royal Society of Chemistry journal article supplement (doi:10.1039/c5nr02329g), 2015-01-01
Supplement: c5nr02329g1.pdf [file c5nr02329g1.pdf]

## Supplementary Information

# Converting 2D Inorganic-organic ZnSe-DETA Hybrid Nanosheets into 3D Hierarchical Nanosheet-based ZnSe Microspheres with Enhanced Visible-light-driven Photocatalytic Performances

Xuan Wu,<sup>‡a</sup> Rui Xu,<sup>‡a</sup> Rongjiao Zhu,<sup>\*a</sup> Rui Wu<sup>ab</sup> and Bin Zhang<sup>\*a</sup>

<sup>a</sup> *Department of Chemistry, School of Science, Tianjin University, and Collaborative Innovation Center of Chemical Science and Engineering (Tianjin), Tianjin, 300072, P. R. China. E-mail: bzhang@tju.edu.cn (B. Z.) zhurongjiao@tju.edu.cn (R. Z.)*

<sup>b</sup> *School of Chemical Engineering and Technology, Tianjin University, Tianjin, 300072, P. R. China.*

<sup>‡</sup> *These authors contributed equally to this work.*

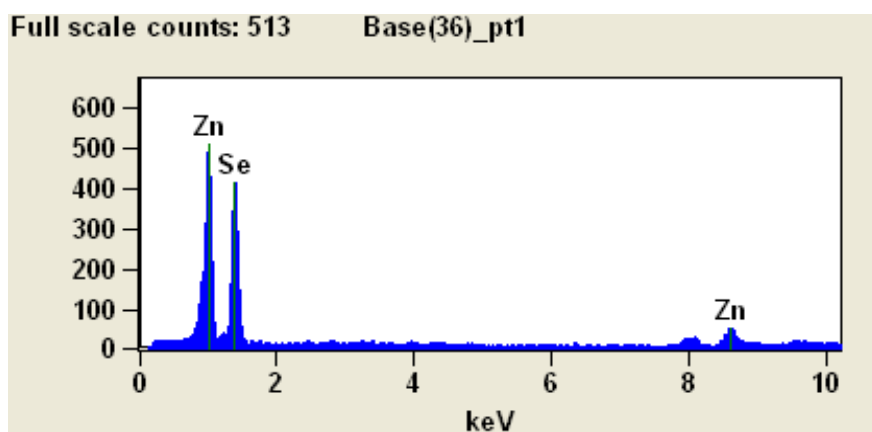

**Figure S1.** EDX spectra of the as-prepared hierarchical nanosheet-based ZnSe microspheres.

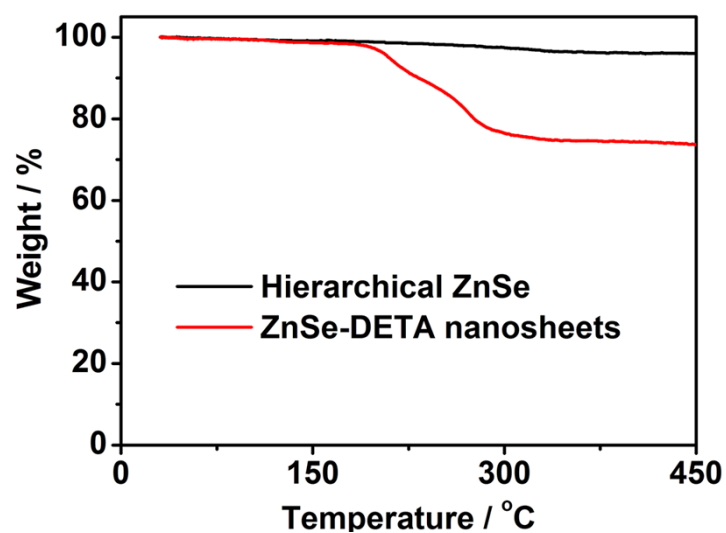

**Figure S2.** TGA curves of 3D hierarchical ZnSe products (black line) and ZnSe precursor (red line).

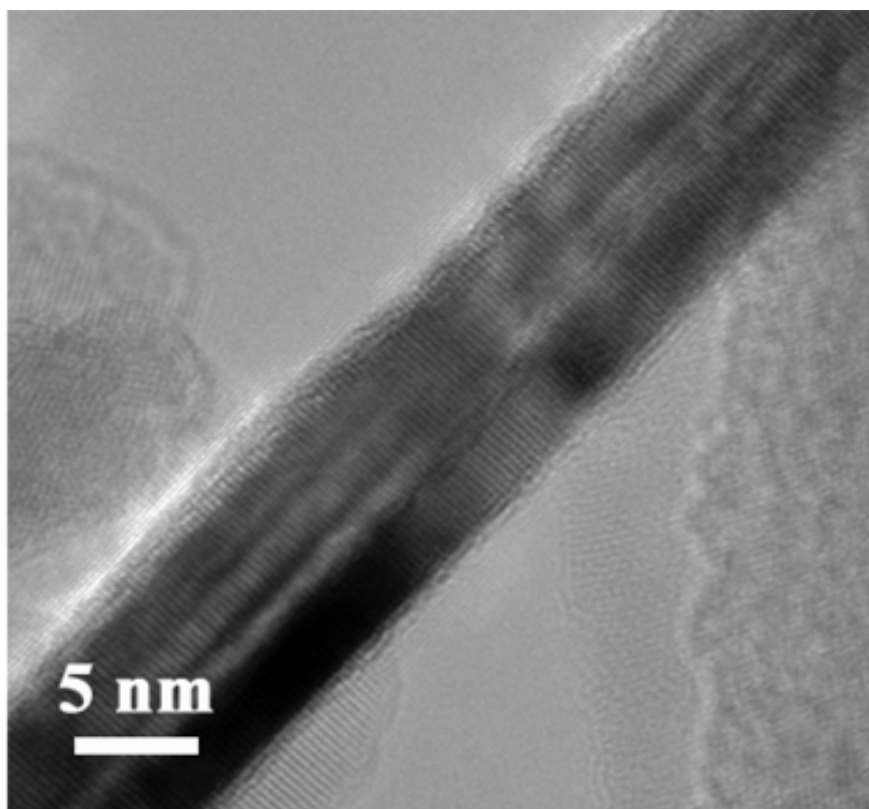

**Figure S3.** TEM image of a perpendicularly isolated ZnSe nanosheet that constructed the hierarchical nanostructures obtained at 150 °C.

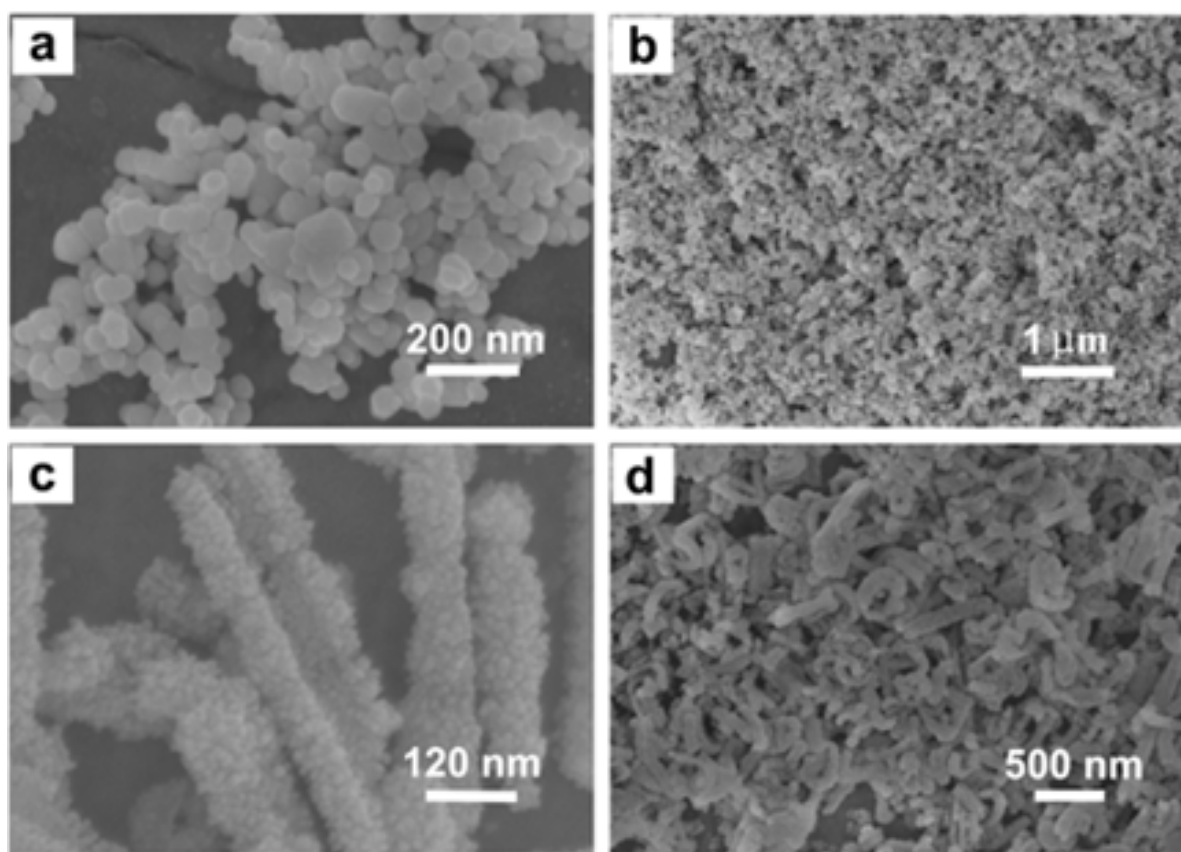

**Figure S4.** SEM images of the products obtained through the organic-component depleted reaction of the rinsed ZnSe-DETA hybrid nanosheets: ZnSe nanoparticles (a, b) obtained by removing the DETA and  $\text{N}_2\text{H}_4\cdot\text{H}_2\text{O}$  in the reaction solution and nanoparticle arrayed ZnSe (c, d) obtained by introducing  $\text{N}_2\text{H}_4\cdot\text{H}_2\text{O}$  (0.8 mL) in the absence of DETA in the reaction system.

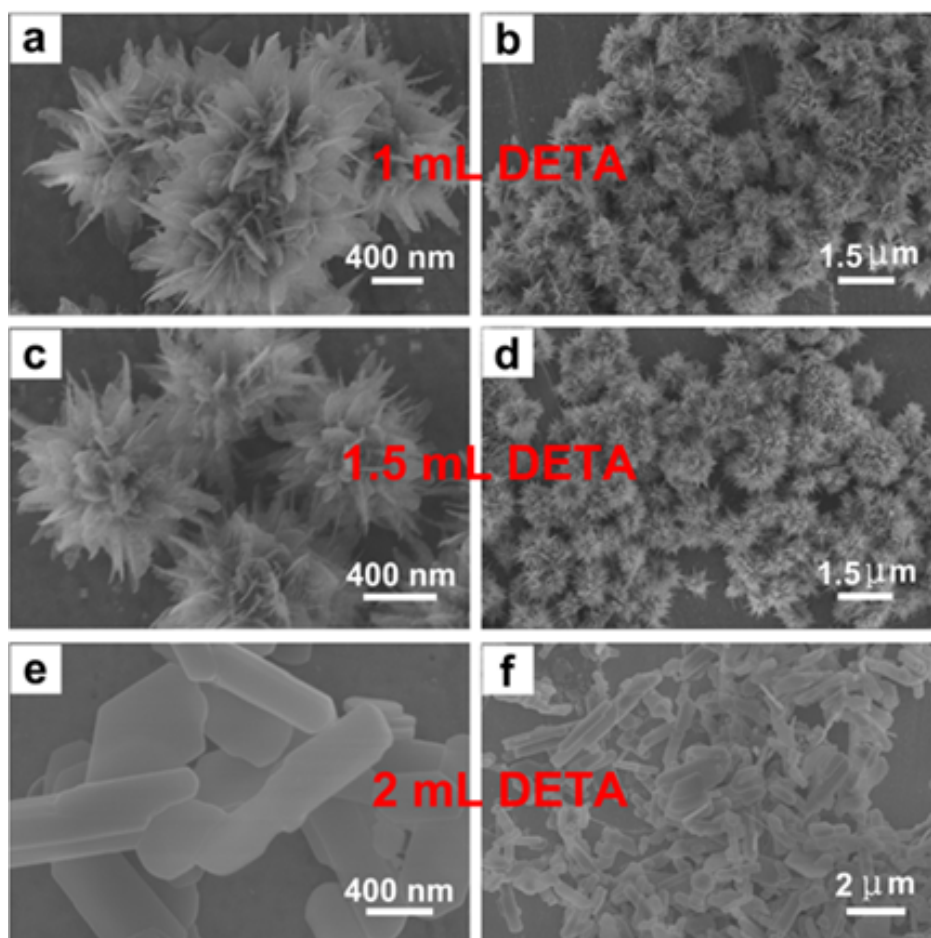

**Figure S5.** SEM images of the products obtained through the transformation reaction of the rinsed ZnSe-DETA sheets by introducing different amounts of DETA into the reaction systems: a, b): 1 mL DETA; c, d): 1.5 mL DETA; e, f): 2.0 mL DETA.

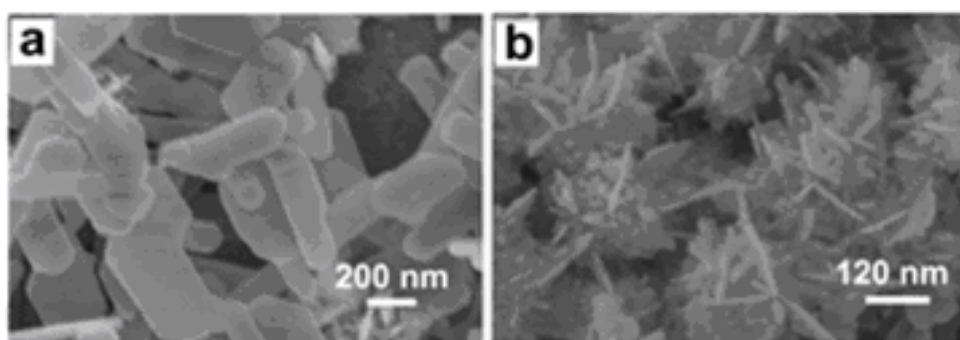

**Figure S6.** SEM images of the products obtained at different reaction temperatures: 140 °C (a) and 180 °C (b).

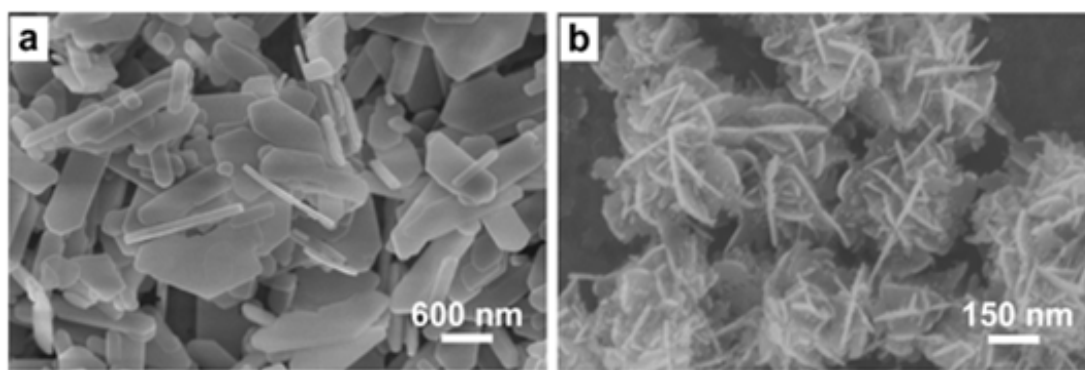

**Figure S7.** SEM images of the products prepared by the transformation reaction of inorganic-organic hybrid ZnSe-DETA nanosheets in EG at 150 °C (a) and 180 °C (b).

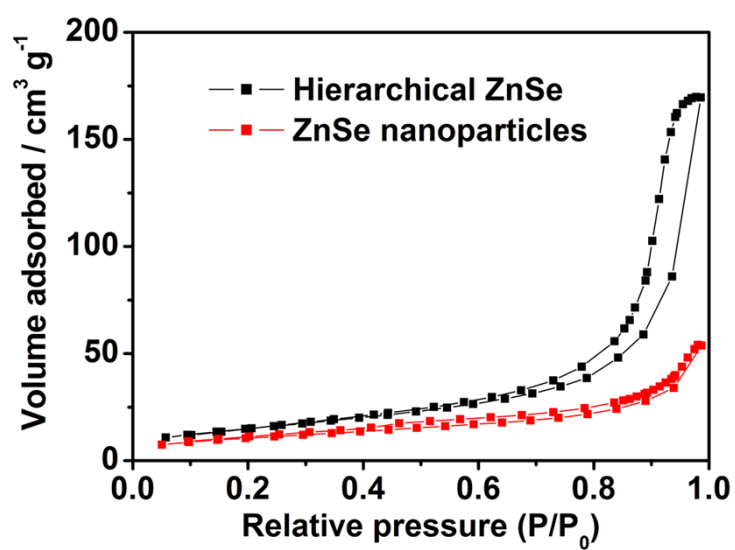

**Figure S8.**  $N_2$  adsorption isotherm curves of hierarchical nanosheet-based ZnSe microspheres (black line) and ZnSe nanoparticles (red line).

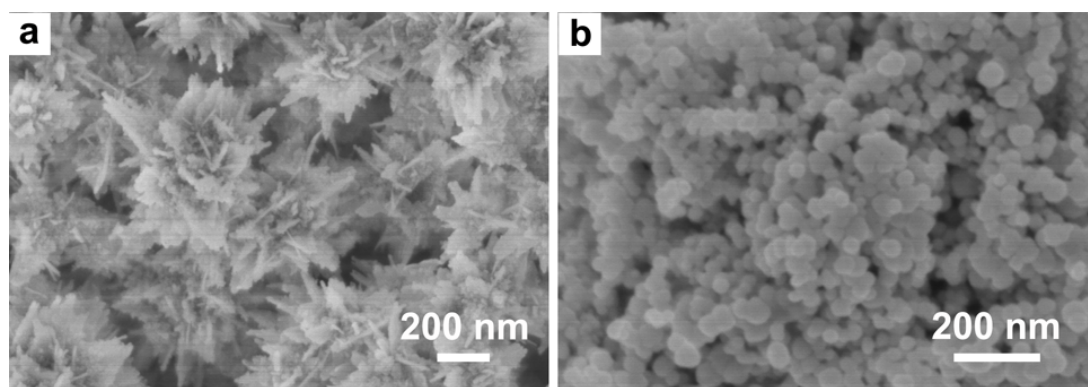

**Figure S9.** SEM images of the ZnSe flower (a) and the ZnSe particle (b) after the 12 h photocatalytic hydrogen evolution.
